# Supplementary material
Source: PubMed Central journal article supplement (PMC3484223)
Supplement: NIHMS388780-supplement-1_si_001.pdf [file NIHMS388780-supplement-1_si_001.pdf]

## Supporting information

Table S1. Primers used for qPCR

|       | Forward primer        | Reverse primer         |
|-------|-----------------------|------------------------|
| HDM2  | ACCTCACAGATTCCAGCTTCG | TTTCATAGTATAAGTGTCTTTT |
| c-myc | TCAAGAGGCGAACACACAAC  | GGCCTTTTCATTGTTTTCCA   |
| VEGF  | GCAGAATCATCACGAAGTGG  | GCATGGTGATGTTGGACTCC   |
| GAPDH | TGCACCACCAACTGCTTAGC  | GGCATGGACTGTGGTCATGAG  |
